# Supplementary material for: A nickel complex of a conjugated bis-dithiocarbazate Schiff base for the photocatalytic production of hydrogen
Source: Royal Society of Chemistry journal article supplement (doi:10.1039/c5dt02042e), 2015-01-01
Supplement: c5dt02042e1.pdf [file c5dt02042e1.pdf]

Supplementary Information for

**A Nickel Complex of a Conjugated  
Bis-dithiocarbazate Schiff Base for the Photocatalytic  
Production of Hydrogen**

*C.F. Wise, D. Liu, K.J. Mayer, P.M. Crossland, C. L. Hartley, and W.R. McNamara\**

Correspondence to: [wrmcnamara@wm.edu](mailto:wrmcnamara@wm.edu)

## List of Figures, Tables, and Text

| <i>Figures</i>                                                                                               | <i>Page</i> |
|--------------------------------------------------------------------------------------------------------------|-------------|
| <b>Figure S1:</b> UV-Vis spectrum of <b>2</b> .....                                                          | 5           |
| <b>Figure S2:</b> CVs of <b>2</b> at various scan rates .....                                                | 6           |
| <b>Figure S3:</b> Peak Current Density vs. [TFA] from Fig.3.....                                             | 7           |
| <b>Figure S4:</b> CVs of TFA addition without catalyst .....                                                 | 8           |
| <b>Figure S5:</b> H <sub>2</sub> Generation by <b>2</b> Under Oxidative Quenching Conditions .....           | 10          |
| <b>Figure S6:</b> GC calibration curve .....                                                                 | 11          |
| <b>Figure S7:</b> <sup>1</sup> H NMR of <b>1</b> .....                                                       | 13          |
| <b>Figure S8:</b> <sup>1</sup> H NMR of <b>2</b> .....                                                       | 14          |
| <b>Figure S9:</b> High Resolution Mass Spectrum of <b>2</b> .....                                            | 15          |
| <b>Figure S10:</b> LED configuration for photocatalysis .....                                                | 16          |
| <b>Figure S11:</b> CV of <b>1</b> .....                                                                      | 17          |
| <b>Figure S12:</b> CV of <b>2</b> and ferrocene in CH <sub>3</sub> CN at varying proton concentrations ..... | 18          |
| <b>Figure S13:</b> CV of TFA using glassy carbon electrode from bulk electrolysis .....                      | 19          |
| <br><i>Tables</i>                                                                                            |             |
| <b>Table S1:</b> Selected Bond Lengths and Angles for <b>2</b> .....                                         | 3           |
| <b>Table S2:</b> Selected X-ray Crystallography Data for <b>2</b> .....                                      | 4           |
| <b>Table S3:</b> Dependence of H <sub>2</sub> Generation on Fluorescein Concentration .....                  | 9           |
| <b>Table S4:</b> Dependence of H <sub>2</sub> Generation on Catalyst Concentration .....                     | 9           |
| <b>Table S5:</b> Dependence of H <sub>2</sub> Generation on pH.....                                          | 9           |
| <br><i>Text</i>                                                                                              |             |
| <b>Calculation of Turnover Number.....</b>                                                                   | <b>12</b>   |

**Table S1.** Selected bond lengths [Å] and angles [°] for **2**.

---

|                  |           |
|------------------|-----------|
| Ni(1)-S(2)       | 2.2222(9) |
| Ni(1)-S(3)       | 2.1358(9) |
| Ni(1)-N(1)       | 1.907(2)  |
| Ni(1)-N(3)       | 1.910(2)  |
| N(1)-N(2)        | 1.381(3)  |
| N(1)-C(8)        | 1.314(4)  |
| N(2)-C(9)        | 1.293(3)  |
| N(3)-N(4)        | 1.401(3)  |
| N(3)-C(15)       | 1.293(4)  |
| N(4)-C(17)       | 1.307(3)  |
| C(9)-C(14)       | 1.510(4)  |
| C(14)-C(15)      | 1.512(4)  |
| S(2)-Ni(1)-S(3)  | 96.31(3)  |
| S(2)-Ni(1)-N(1)  | 73.61(8)  |
| S(2)-Ni(1)-N(3)  | 174.25(7) |
| S(3)-Ni(1)-N(1)  | 163.09(8) |
| S(3)-Ni(1)-N(3)  | 88.30(7)  |
| N(1)-Ni(1)-N(3)  | 102.7(1)  |
| Ni(1)-S(2)-C(8)  | 76.16(9)  |
| Ni(1)-S(3)-C(17) | 94.75(9)  |
| Ni(1)-N(1)-N(2)  | 135.4(2)  |
| Ni(1)-N(1)-C(8)  | 98.2(2)   |
| N(1)-N(2)-C(9)   | 113.8(2)  |
| Ni(1)-N(3)-N(4)  | 119.7(2)  |
| Ni(1)-N(3)-C(15) | 124.1(2)  |
| N(3)-N(4)-C(17)  | 111.2(2)  |
| S(2)-C(8)-N(1)   | 109.0(2)  |
| N(2)-C(9)-C(14)  | 122.2(2)  |
| N(3)-C(15)-C(14) | 121.4(2)  |
| S(3)-C(17)-N(4)  | 125.6(2)  |

**Table S2.** Selected X-ray Crystallography Data for **2**.

|                                |                                                                                |
|--------------------------------|--------------------------------------------------------------------------------|
| Empirical formula              | C <sub>24</sub> H <sub>19</sub> F <sub>3</sub> N <sub>4</sub> NiS <sub>5</sub> |
| fw (g/mol)                     | 639.44                                                                         |
| color/habit                    | Brown block                                                                    |
| T (K)                          | 100(2) K                                                                       |
| Space group                    | Pna2 <sub>1</sub>                                                              |
| Z                              | 12                                                                             |
| a (Å)                          | 8.8108(3)                                                                      |
| b (Å)                          | 31.9395(9)                                                                     |
| c (Å)                          | 27.7375(8)                                                                     |
| α (deg)                        | 90                                                                             |
| β (deg)                        | 90                                                                             |
| γ (deg)                        | 90                                                                             |
| V (Å <sup>3</sup> )            | 7805.7(4)                                                                      |
| Final R indices (I>2σ)         | 0.0218, 0.0547                                                                 |
| Final R indices (all data)     | 0.0224, 0.0550                                                                 |
| GOF                            | 1.051                                                                          |
| No. reflections measured       | 81886                                                                          |
| No. of independent reflections | 13604                                                                          |
| R <sub>int</sub>               | 0.0524                                                                         |

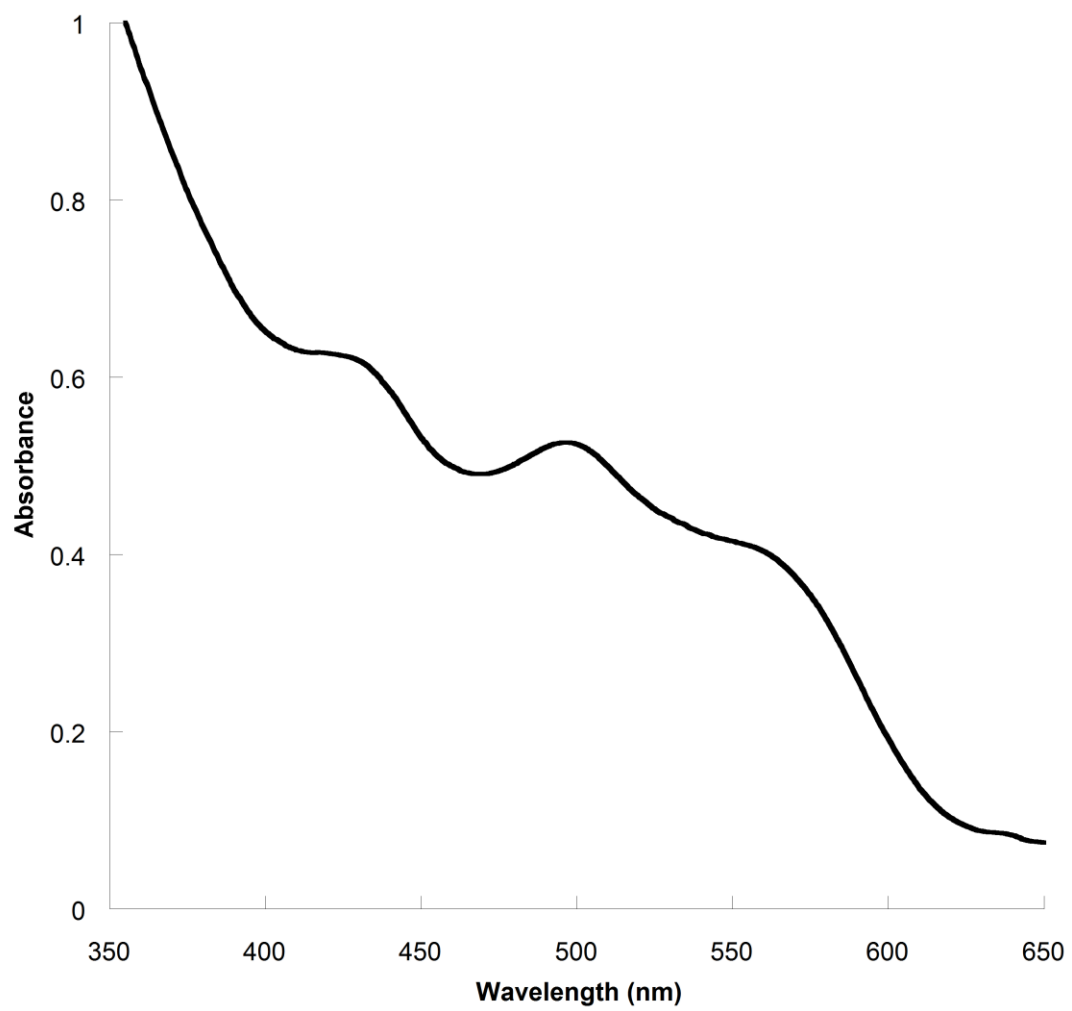

**Figure S1.** UV-Vis spectrum of **2** in dichloromethane.

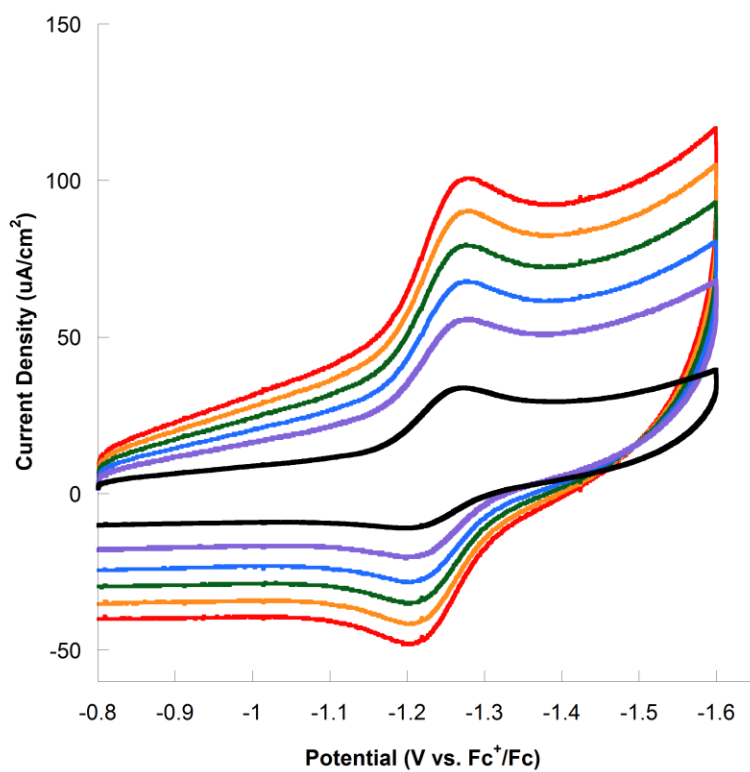

**Figure S2.** CVs of 0.5 mg **2** in 5 mL CH<sub>3</sub>CN with 0.1 M TBAPF<sub>6</sub> scanned from -0.80 V vs. Fc<sup>+</sup>/Fc to -1.60 V vs. Fc<sup>+</sup>/Fc with no acid added at 150 mV/s (black), 300 mV/s (purple), 450 mV/s (blue), 600 mV/s (green), 750 mV/s (orange), and 900 mV/s (red).

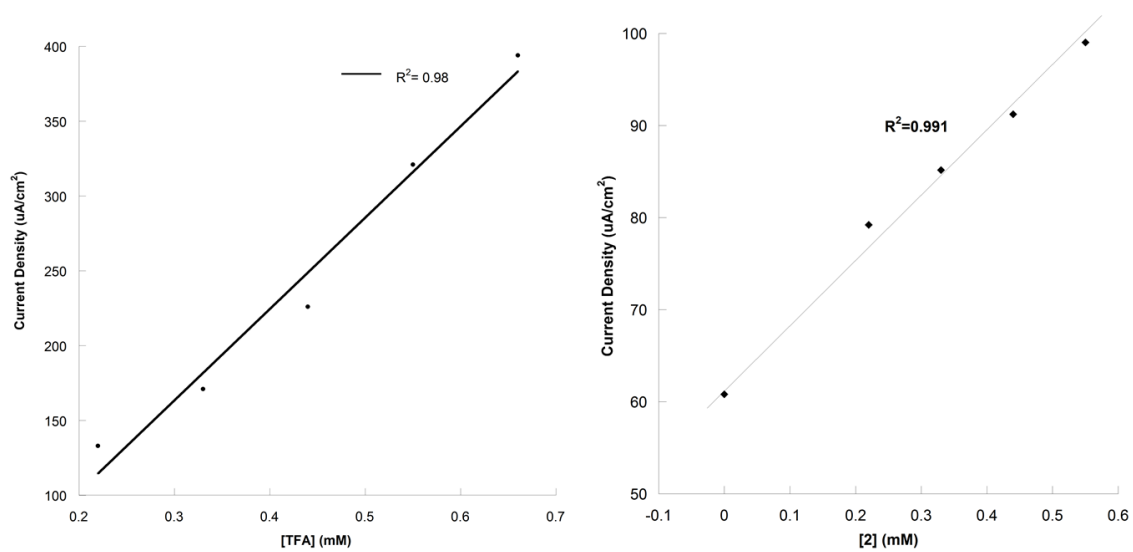

**Figure S3.** *Left:* Peak current density vs. [TFA] corresponding to catalytic wave at -1.7 V vs.  $\text{Fc}^+/\text{Fc}$  of Figure 3 in the text. *Right:* Peak current density vs. [TFA] corresponding to reduction event at -1.25 V vs.  $\text{Fc}^+/\text{Fc}$  of Figure 3 in the text.

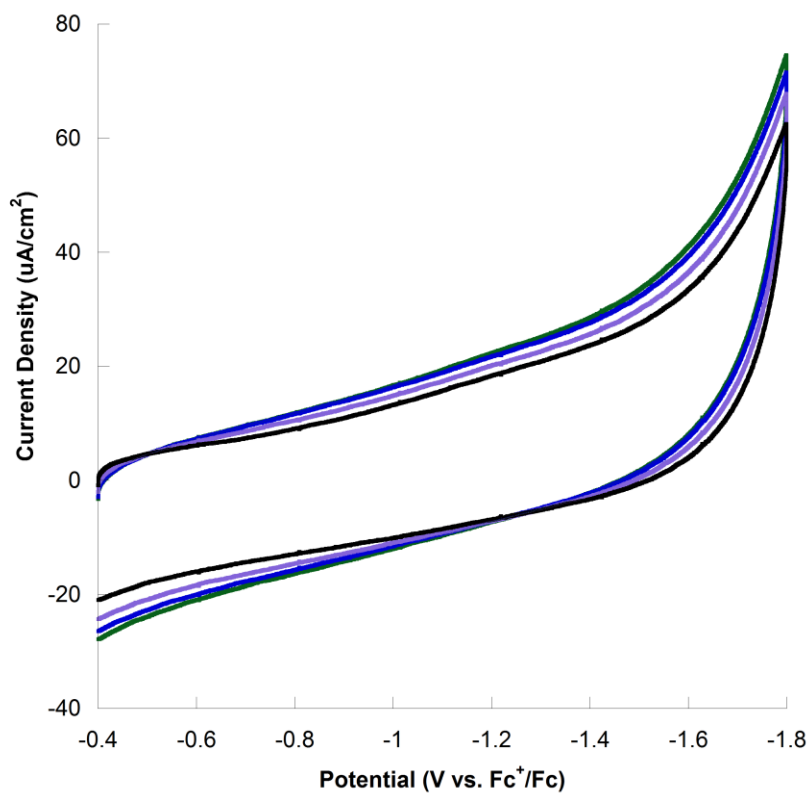

**Figure S4.** CVs in CH<sub>3</sub>CN (0.1 M TBAPF<sub>6</sub>) upon addition of 15 μL (black), 20 μL (purple), 25 μL (blue), and 30 μL (green) of a 0.11 M TFA solution with no catalyst.



| [Fluorescein] (M)      | [Catalyst] (M)          | H <sub>2</sub> (μL) | TON |
|------------------------|-------------------------|---------------------|-----|
| 1.0 x 10 <sup>-3</sup> | 1.25 x 10 <sup>-6</sup> | 28.9                | 180 |
| 1.2 x 10 <sup>-3</sup> | 1.25 x 10 <sup>-6</sup> | 20.0                | 130 |
| 1.4 x 10 <sup>-3</sup> | 1.25 x 10 <sup>-6</sup> | 31.1                | 200 |
| 1.6 x 10 <sup>-3</sup> | 1.25 x 10 <sup>-6</sup> | 53.9                | 340 |
| 1.8 x 10 <sup>-3</sup> | 1.25 x 10 <sup>-6</sup> | 42.3                | 270 |

**Table S3.** Photocatalytic hydrogen generation with 1.25 x 10<sup>-6</sup> M **2**, 0.36 M TEA, and various FI concentrations in 1:1 EtOH:H<sub>2</sub>O after 14 hours of irradiation with green LEDs (λ = 520 nm, 0.12 W).

| [Fluorescein] (M)      | [Catalyst] (M)          | H <sub>2</sub> (μL) | TON  |
|------------------------|-------------------------|---------------------|------|
| 1.6 x 10 <sup>-3</sup> | 7.50 x 10 <sup>-7</sup> | 24.8                | 370  |
| 1.6 x 10 <sup>-3</sup> | 1.00 x 10 <sup>-6</sup> | 147.4               | 1600 |
| 1.6 x 10 <sup>-3</sup> | 1.75 x 10 <sup>-6</sup> | 125.6               | 800  |
| 1.6 x 10 <sup>-3</sup> | 2.50 x 10 <sup>-6</sup> | 42.3                | 190  |

**Table S4.** Photocatalytic hydrogen generation with 1.6 x 10<sup>-3</sup> M FI, 0.36 M TEA, and various concentrations of **2** in 1:1 EtOH:H<sub>2</sub>O after 14 hours of irradiation with green LEDs (λ = 520 nm, 0.12 W).

| [Fluorescein] (M)      | [Catalyst] (M)          | pH   | H <sub>2</sub> (μL) | TON  |
|------------------------|-------------------------|------|---------------------|------|
| 1.6 x 10 <sup>-3</sup> | 1.00 x 10 <sup>-6</sup> | 12   | 78.3                | 900  |
| 1.6 x 10 <sup>-3</sup> | 1.00 x 10 <sup>-6</sup> | 12.5 | 131.4               | 1400 |
| 1.6 x 10 <sup>-3</sup> | 1.00 x 10 <sup>-6</sup> | 13   | 147.4               | 1600 |
| 1.6 x 10 <sup>-3</sup> | 1.00 x 10 <sup>-6</sup> | 13.5 | 43.7                | 500  |

**Table S5.** Photocatalytic hydrogen generation with 1.6 x 10<sup>-3</sup> M FI, 0.36 M TEA, and 1.00 x 10<sup>-6</sup> M **2** in 1:1 EtOH:H<sub>2</sub>O at various pHs after 14 hours of irradiation with green LEDs (λ = 520 nm, 0.12 W).

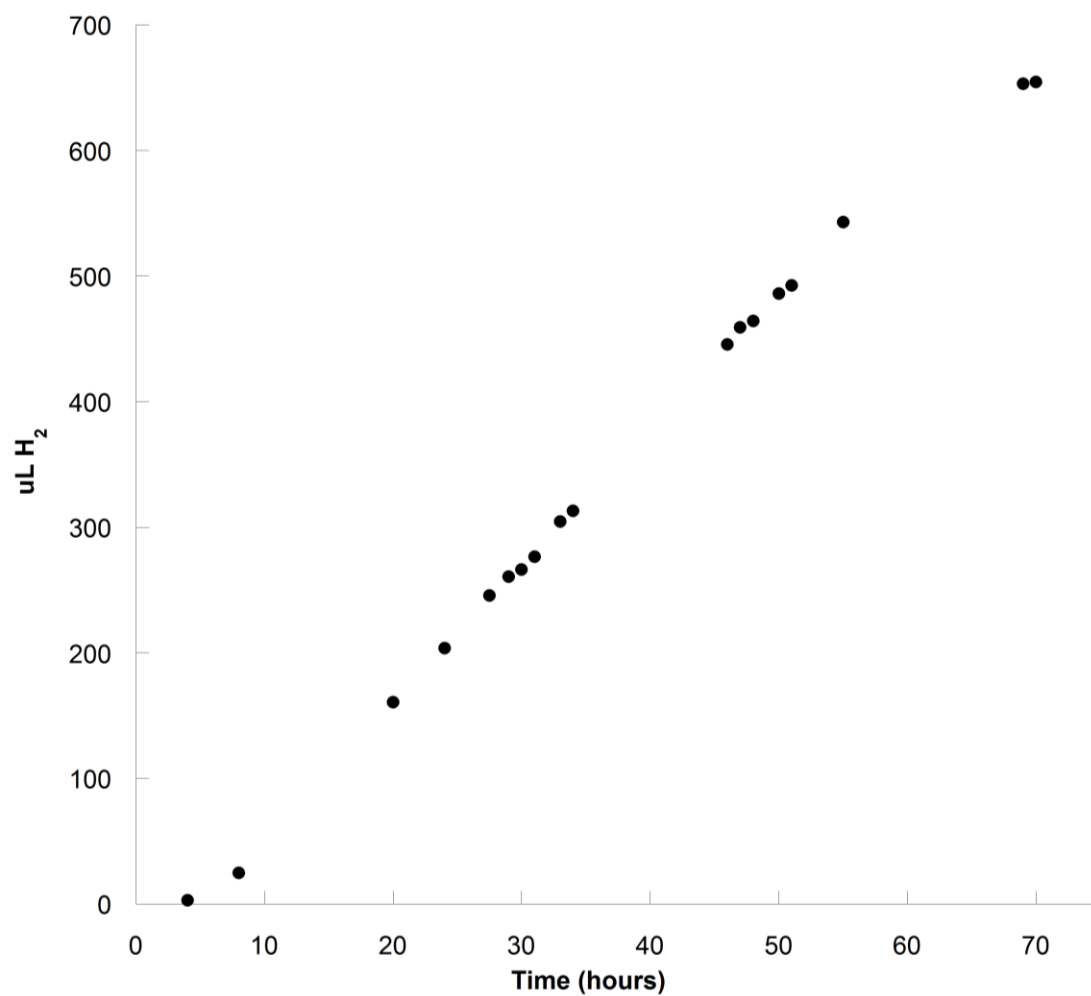

**Figure S5.** Photocatalytic hydrogen generation over time from a solution of **1** ( $5 \times 10^{-4}$  M), **2** ( $5 \times 10^{-5}$  M), and 1.96% V/V TEA in 1:1 EtOH:H<sub>2</sub>O. 0.1% V/V TEA was added after 31 hours and 48 hours of irradiation.

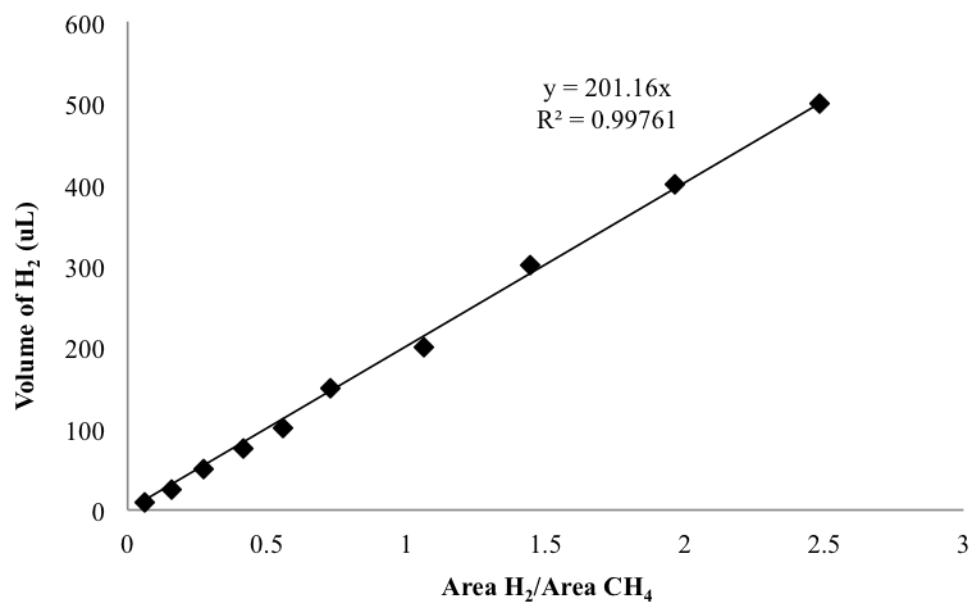

**Figure S6.** Calibration curve of H<sub>2</sub> to CH<sub>4</sub> peak areas used for determining photocatalytic hydrogen generation.

### Calculation of Turnover Number

The turnover number for hydrogen generation by **2** can be determined using a calibration curve comparing the peak areas of H<sub>2</sub> and CH<sub>4</sub> in a gas chromatogram. Based on the calibration curve, the amount of H<sub>2</sub> produced (μL) is linearly related to the area ratio of H<sub>2</sub> to CH<sub>4</sub> with a slope of 201.16, as shown in equation (1).

$$(1) \mu L H_2 = 201.16 \left( \frac{Area H_2}{Area CH_4} \right)$$

TON is defined as moles of H<sub>2</sub> per mole of catalyst. Moles of catalyst are determined during the experimental set-up, and moles of H<sub>2</sub> can be calculated from μL.

A sample calculation can be seen below:

$$\mu L H_2 = 201.16 \left( \frac{18266.6}{29758.5} \right) = 123.5$$

$$123.5 \mu L H_2 \times \frac{1 L}{1 \times 10^6 \mu L} \times \frac{1 mol}{22.4 L} = 5.51 \times 10^{-6} mol H_2$$

$$50 \mu L catalyst \times \frac{1 L}{1 \times 10^6 \mu L} \times \frac{0.1 mmol}{1 L} \times \frac{1 mol}{1000 mmol} = 5 \times 10^{-9} mol$$

$$TON = \frac{5.51 \times 10^{-6} mol H_2}{5 \times 10^{-9} mol catalyst} = 1100$$

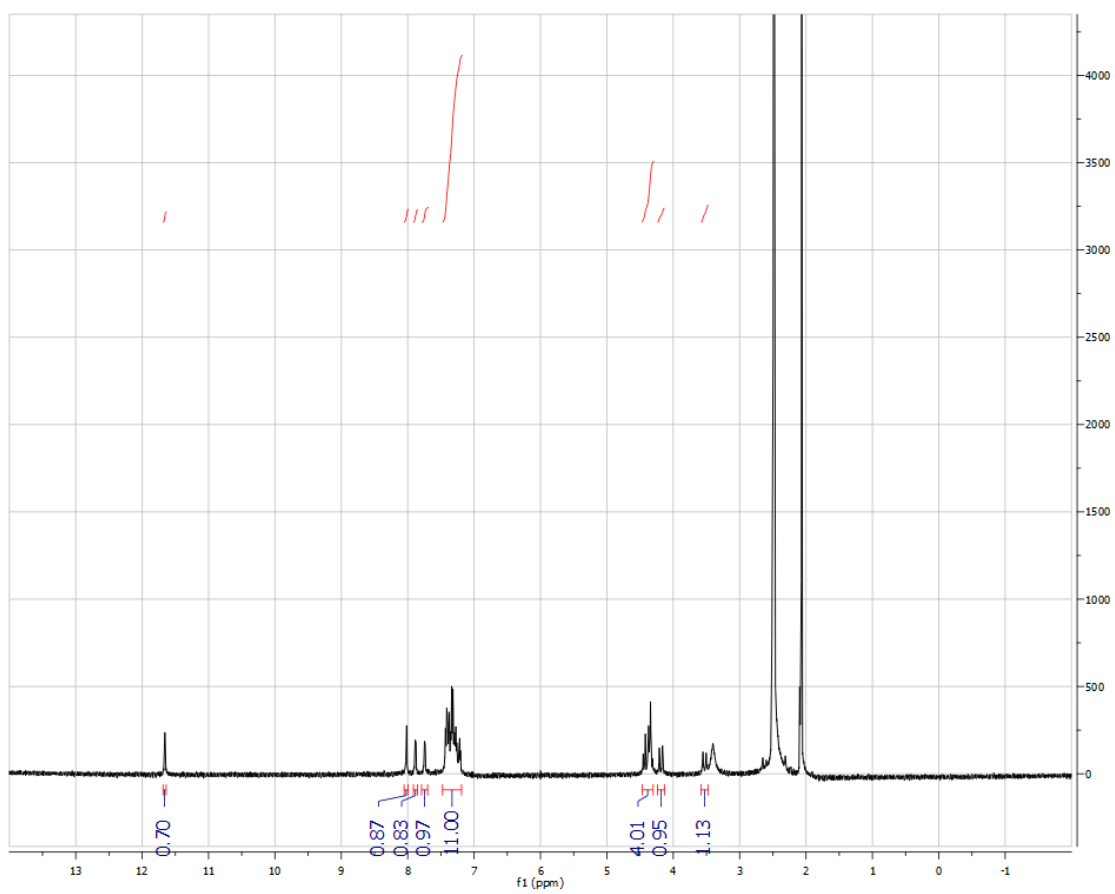

**Figure S7.**  $^1\text{H}$  NMR of **1** in  $\text{DMSO-d}_6$ .

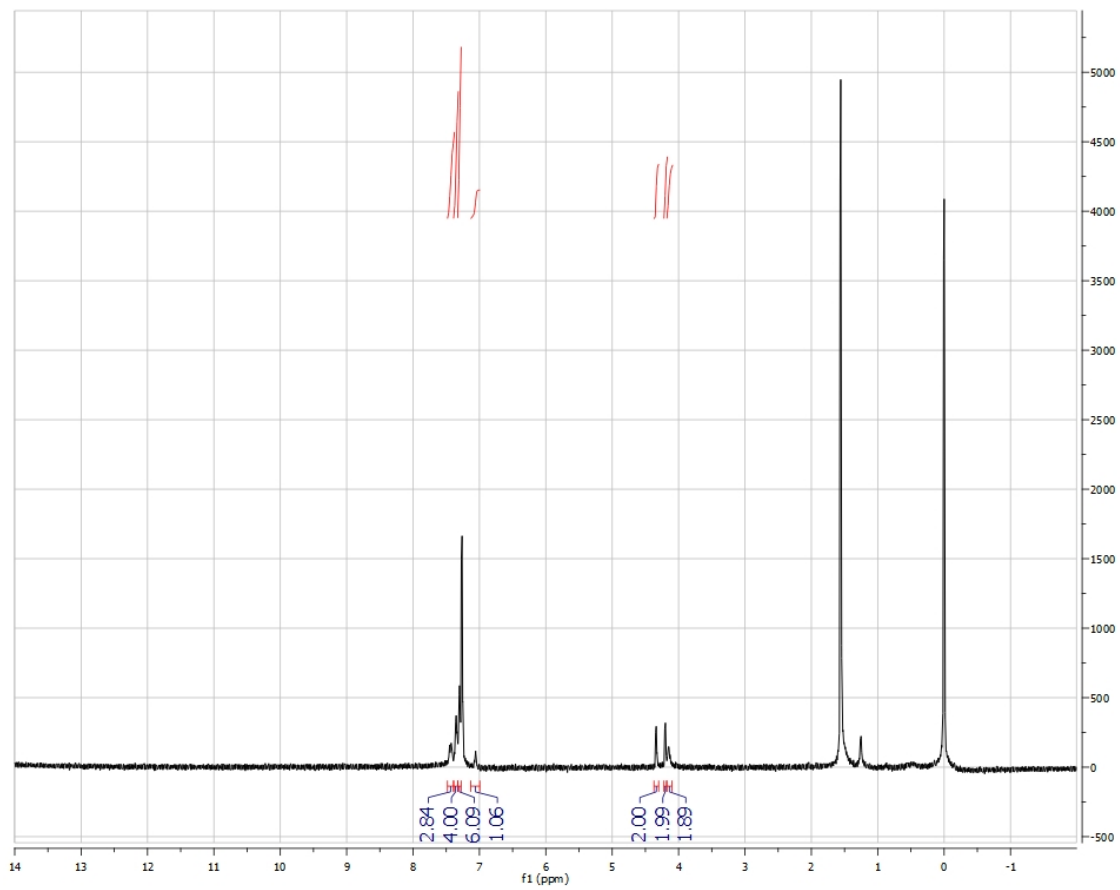

**Figure S8.**  $^1\text{H}$  NMR of **2** in  $\text{CDCl}_3$ .

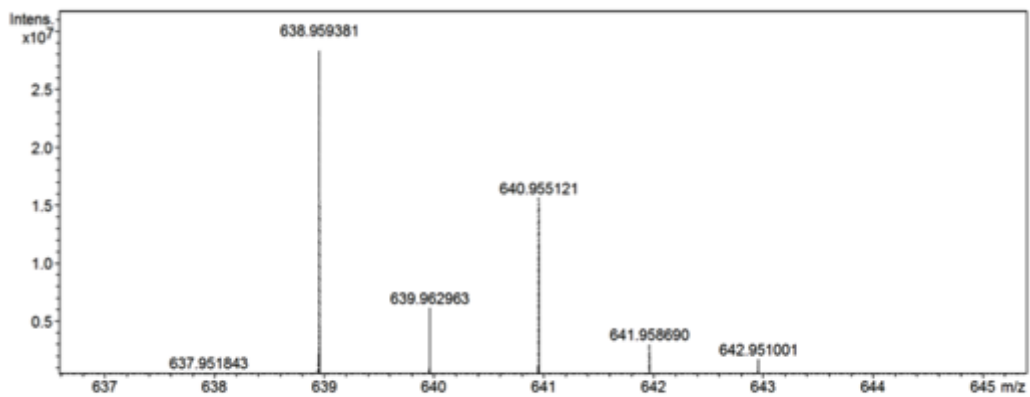

**Figure S9.** High-resolution mass spectrum of **2**. Analysis was completed through positive electrospray ionization on a Bruker 12 Tesla APEX-Qe FTICR-MS with an Apollo II ion source.

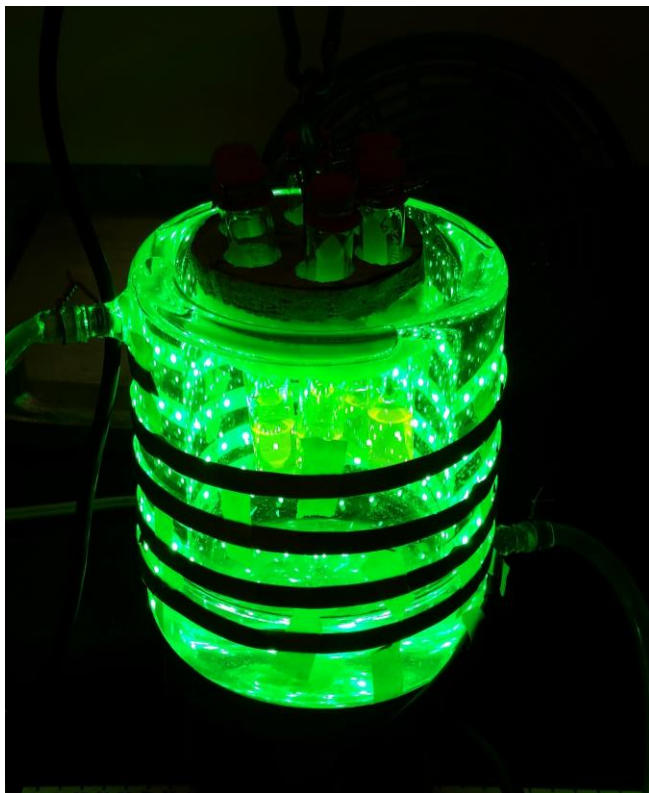

**Figure S10.** Image of the photocatalytic reaction vessel. An LED ribbon is attached to the outside of a jacketed beaker that is cooled to 20°C. The samples are in test tubes that are rotated inside of the beaker.



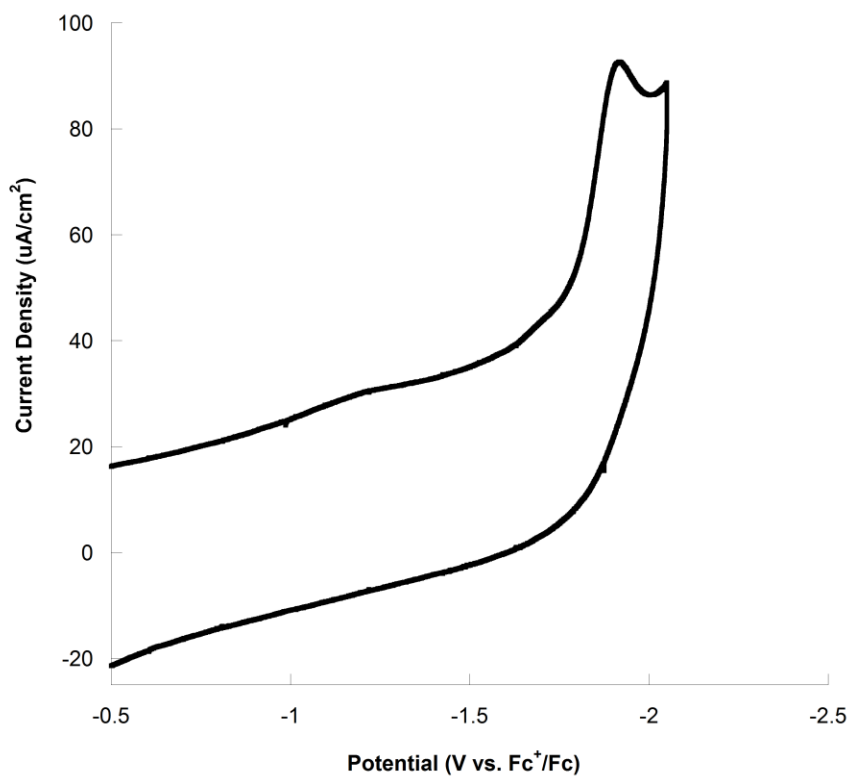

**Figure S11.** CV of 0.5 mg ligand **1** in a solution of 0.1 M TBAPF<sub>6</sub> in CH<sub>3</sub>CN.

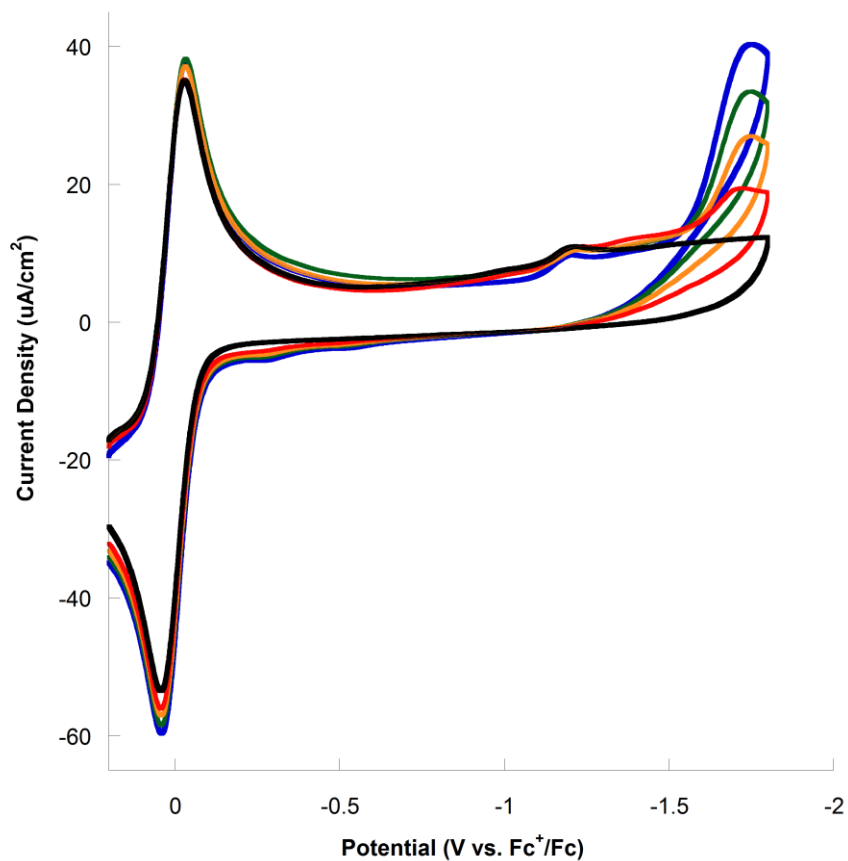

**Figure S12.** CVs of **2** in CH<sub>3</sub>CN with 0.1 M TBAPF<sub>6</sub> without acid added (black), and in the presence of 0.22 mM (red), 0.33 mM (orange), 0.44 mM (green), and 0.55 mM (blue) TFA. Ferrocene was added as an internal reference and the redox couple for Fc<sup>+</sup>/Fc was set to 0 V vs. Fc<sup>+</sup>/Fc.

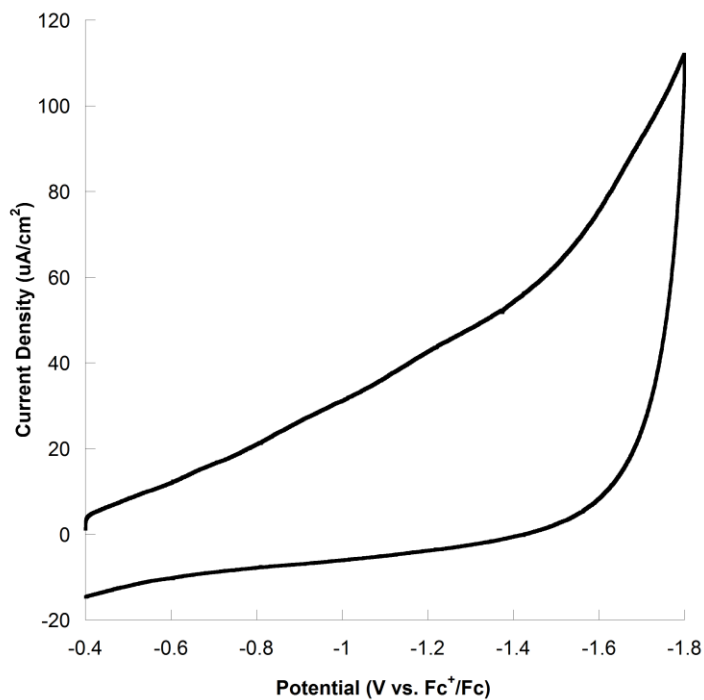

**Figure S13.** CV of 0.77 mM TFA in a 0.1 M solution of TBAPF<sub>6</sub> in CH<sub>3</sub>CN using a glassy carbon working electrode that was used in a bulk electrolysis experiment. Bulk electrolysis was performed with **2** at -1.8 V vs. Fc<sup>+</sup>/Fc for 1600 seconds. The glassy carbon working electrode was rinsed with CH<sub>3</sub>CN (not polished) prior to obtaining this CV.
